# Supplementary material for: Deducing the N- and O- glycosylation profile of the spike protein of novel coronavirus SARS-CoV-2
Source: bioRxiv or medRxiv preprint supplement (doi:10.1101/2020.04.01.020966), 2020-04-06
Supplement: Supplementary file [file media-1.pdf]

## Deducing the N- and O- glycosylation profile of the spike protein of novel coronavirus SARS-CoV-2

Asif Shajahan, Nitin T. Supekar, Anne S. Gleinich, and Parastoo Azadi\*.

Complex Carbohydrate Research Center, The University of Georgia, Athens, GA 30602

\*Corresponding Author: Parastoo Azadi, Ph.D. (azadi@uga.edu)

### Supplementary Information

#### Table of Contents

| Description                                                                                 | Page No.   |
|---------------------------------------------------------------------------------------------|------------|
| Supp. Figure S1-S4: Spectra of intact O-glycopeptide with assigned O-glycans at T323 & S325 | S-2 to S-3 |
| Supp. Figure S5: Spectra of non-glycosylated peptide at N17                                 | S-4        |
| Supp. Figure S6: Spectra of intact N-glycopeptide with assigned N-glycan at N61             | S-4        |
| Supp. Figure S7: Spectra of intact N-glycopeptide with assigned N-glycans at N74            | S-5        |
| Supp. Figure S8: Spectra of intact N-glycopeptide with assigned N-glycans at N122           | S-5        |
| Supp. Figure S9: Spectra of intact N-glycopeptide with assigned N-glycan at N149            | S-6        |
| Supp. Figure S10: Spectra of intact N-glycopeptide with assigned N-glycan at N165           | S-6        |
| Supp. Figure S11: Spectra of intact N-glycopeptide with assigned N-glycan at N234           | S-7        |
| Supp. Figure S12: Spectra of intact N-glycopeptide with assigned N-glycan at N282           | S-7        |
| Supp. Figure S13: Spectra of intact N-glycopeptide with assigned N-glycan at N331           | S-8        |
| Supp. Figure S14: Spectra of intact N-glycopeptide with assigned N-glycan at N343           | S-8        |
| Supp. Figure S15: Spectra of non-glycosylated peptide at N603                               | S-9        |
| Supp. Figure S16: Spectra of intact N-glycopeptide with assigned N-glycan at N616           | S-9        |
| Supp. Figure S17: Spectra of intact N-glycopeptide with assigned N-glycan at N657           | S-10       |
| Supp. Figure S18: Spectra of intact N-glycopeptide with assigned N-glycan at N801           | S-10       |
| Supp. Figure S19: Spectra of intact N-glycopeptide with assigned N-glycan at N1074          | S-11       |
| Supp. Figure S20: Spectra of intact N-glycopeptide with assigned N-glycan at N1098          | S-11       |
| Supp. Figure S21: Spectra of non-glycosylated peptide at N1158                              | S-12       |
| Supp. Figure S22: Spectra of non-glycosylated peptide at N1173                              | S-12       |
| Supp. Figure S23: Spectra of intact N-glycopeptide with assigned N-glycan at N1194          | S-13       |

Glycopeptide Analysis:

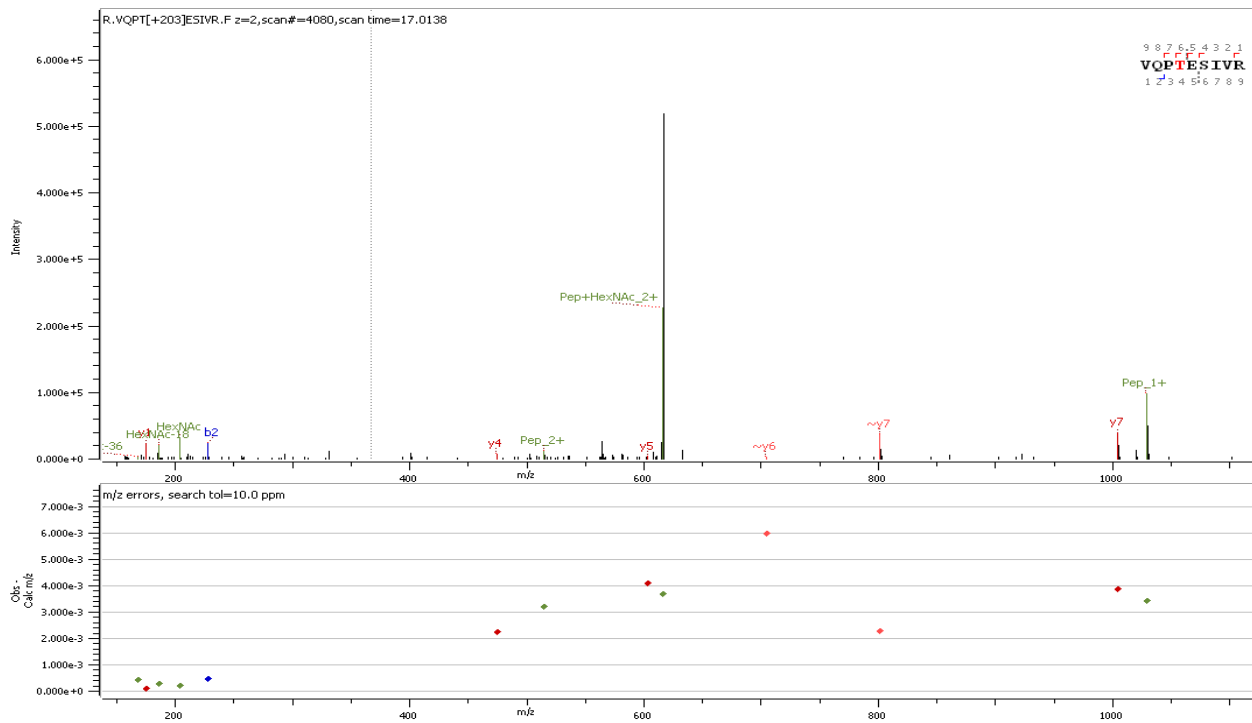

**Supp. Figure S1** Spectra of intact O-glycopeptide with assigned O-glycan (GalNAcGal) at T323

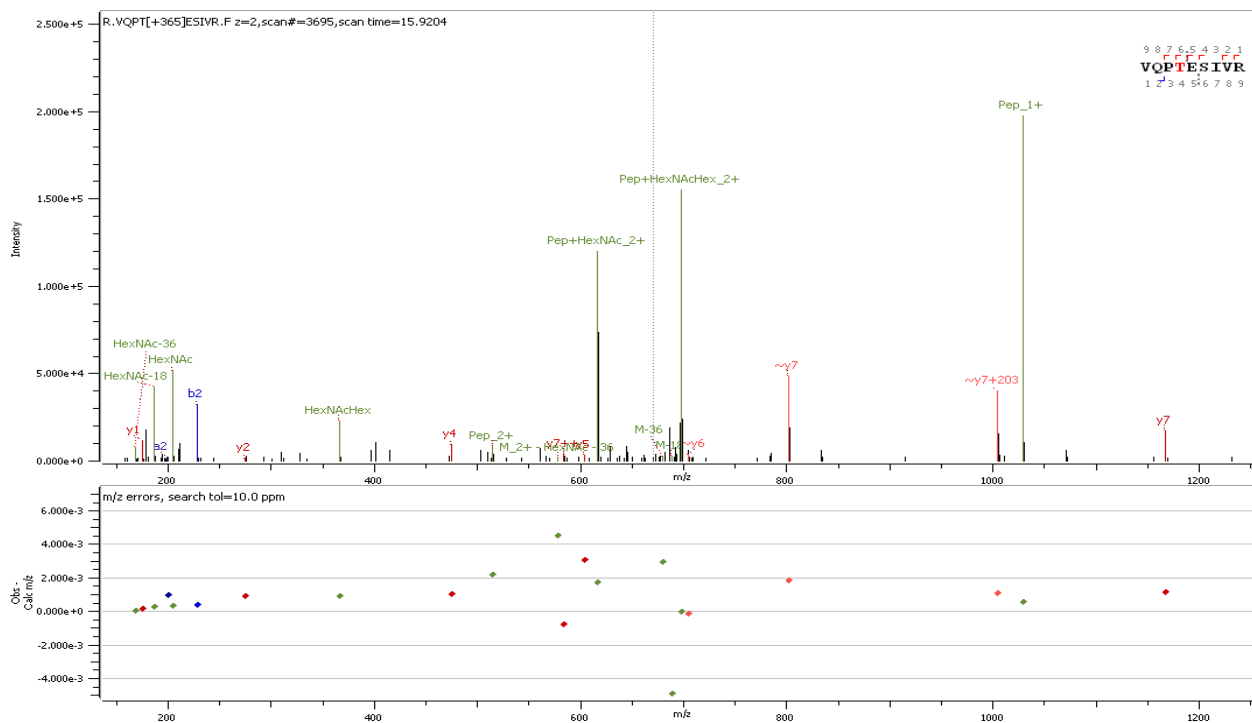

**Supp. Figure S2** Spectra of intact O-glycopeptide with assigned O-glycan (GalNAcGal) at T323

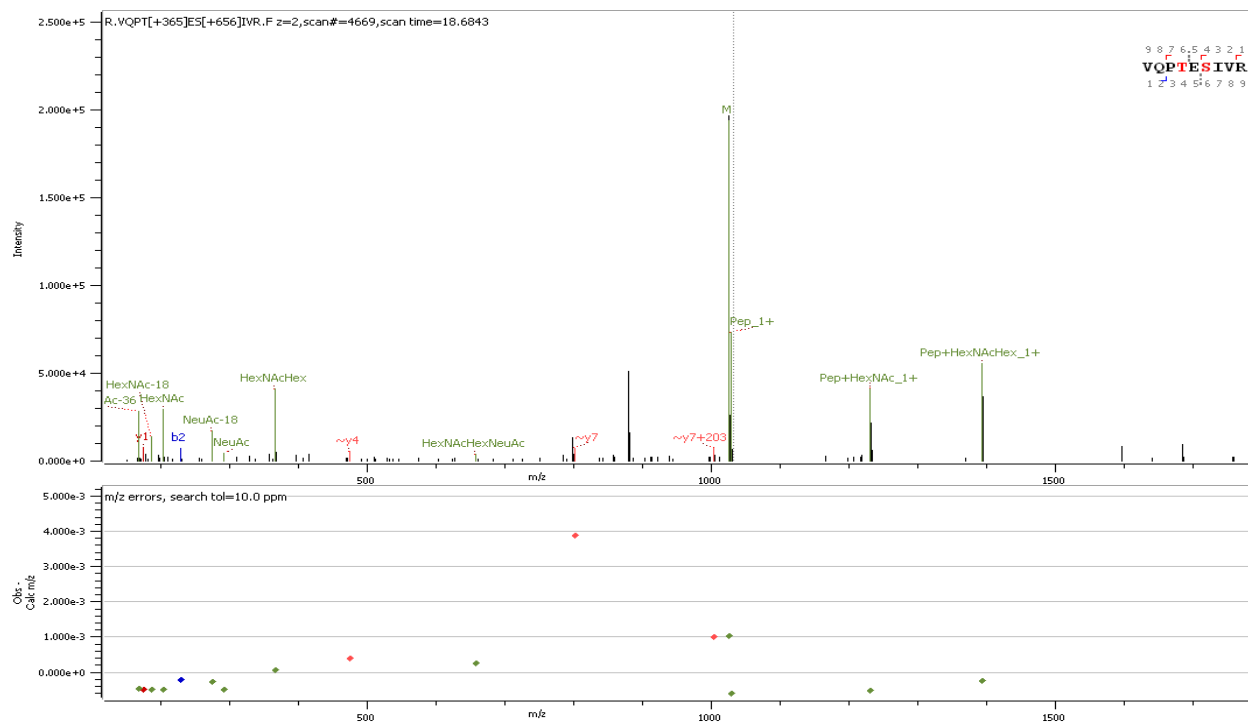

**Supp. Figure S3** Spectra of intact O-glycopeptide with assigned O-glycan (GalNAcGal) at T323 & (GalNAcGalNeuAc<sub>1</sub>) at S325

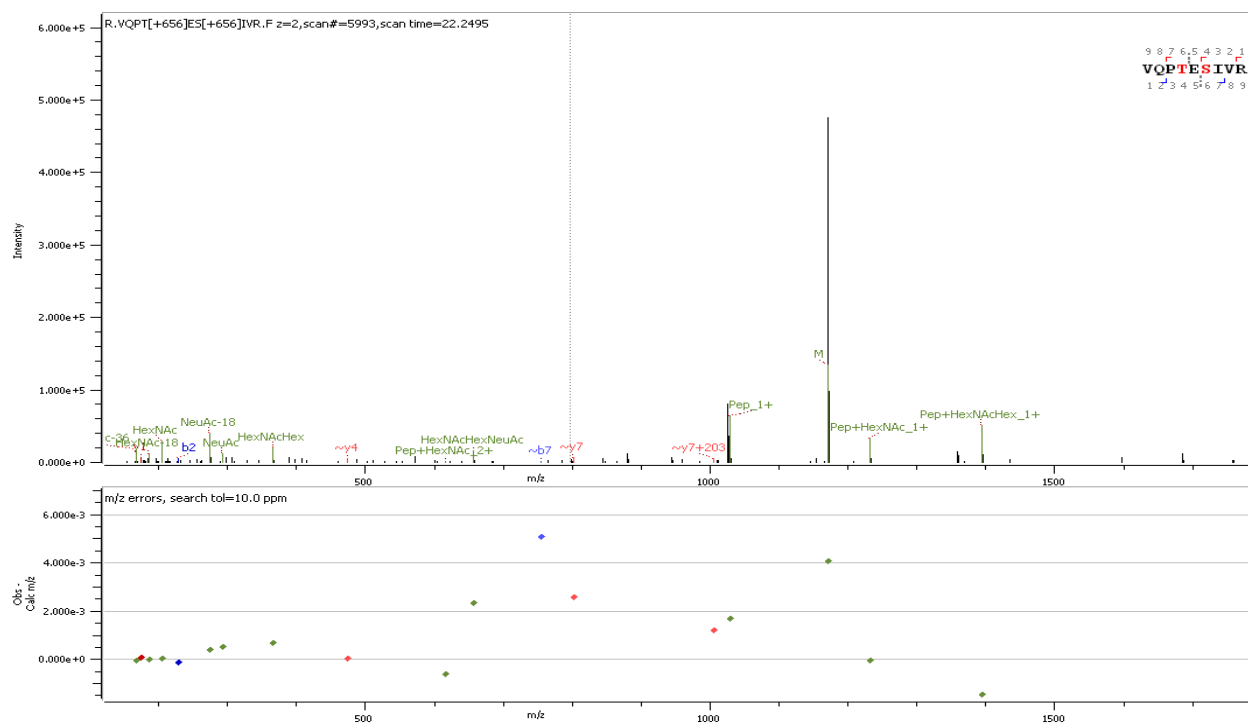

**Supp. Figure S4** Spectra of intact O-glycopeptide with assigned O-glycan (GalNAcGalNeuAc<sub>1</sub>) at T323 & (GalNAcGalNeuAc<sub>1</sub>) at S325

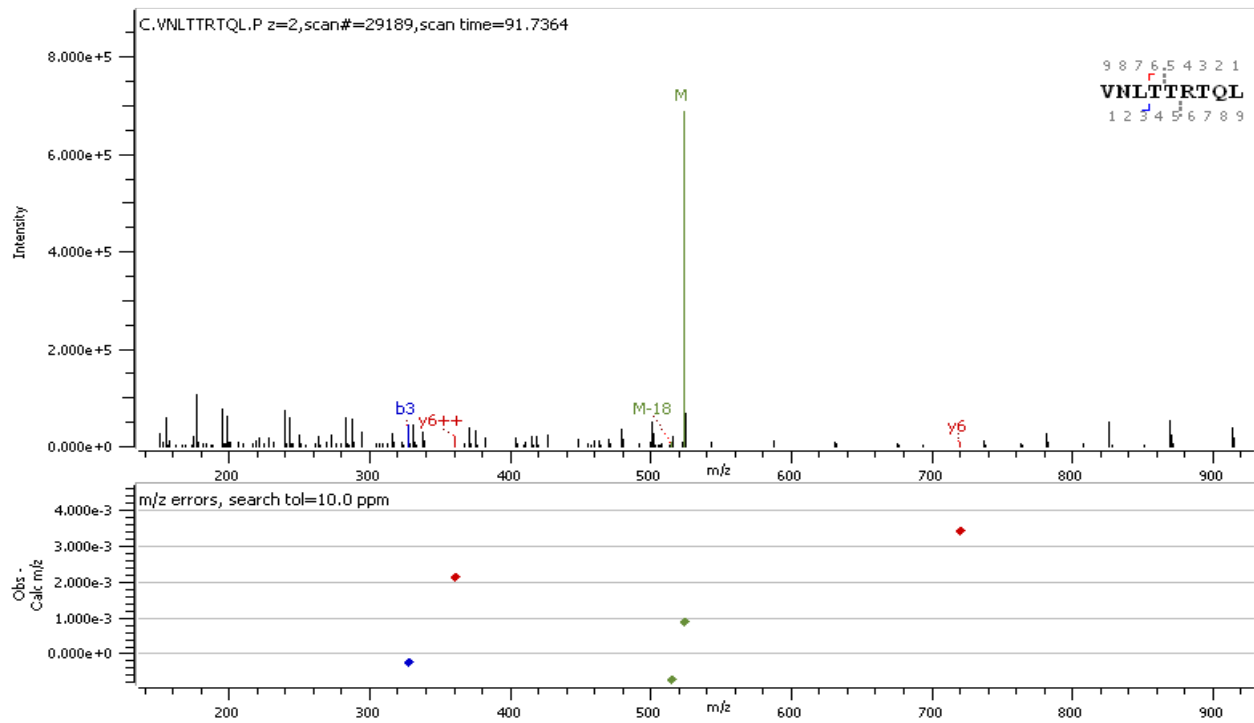

Supp. Figure S5. Spectra of non-glycosylated peptide at N17

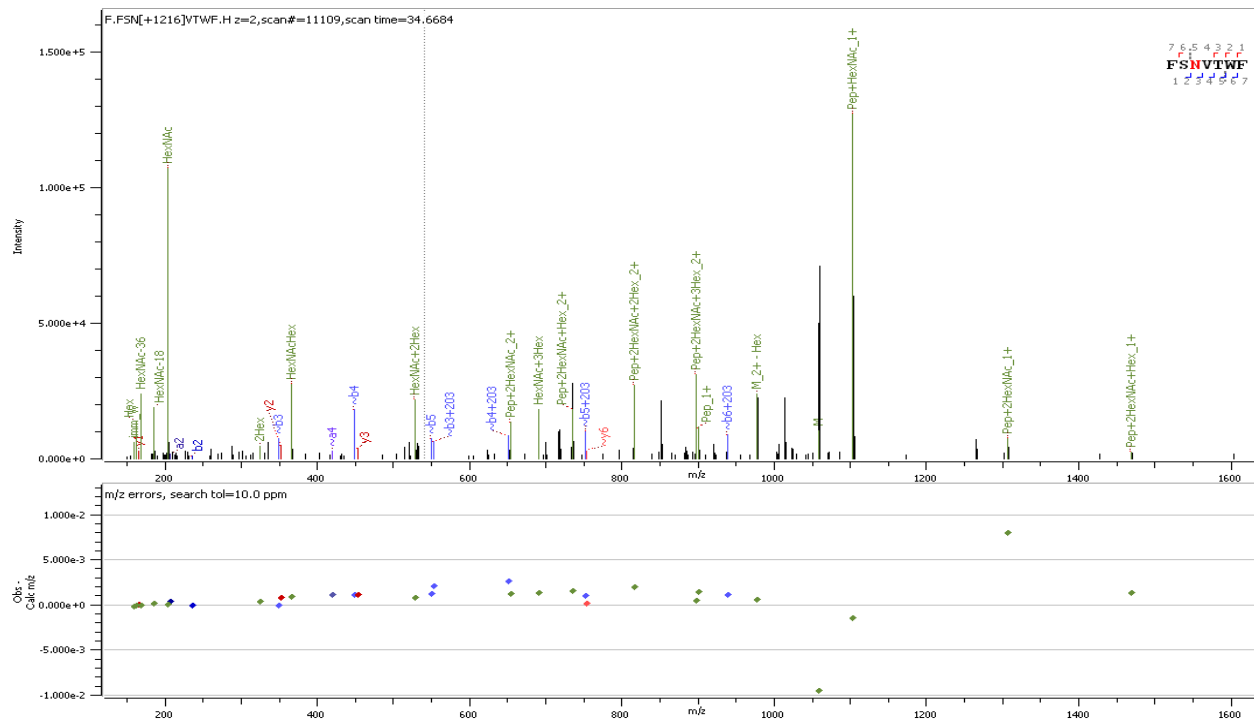

Supp. Figure S6 Spectra of intact N-glycopeptide with assigned N-glycan (GlcNAc<sub>2</sub>Man<sub>5</sub>) at N61

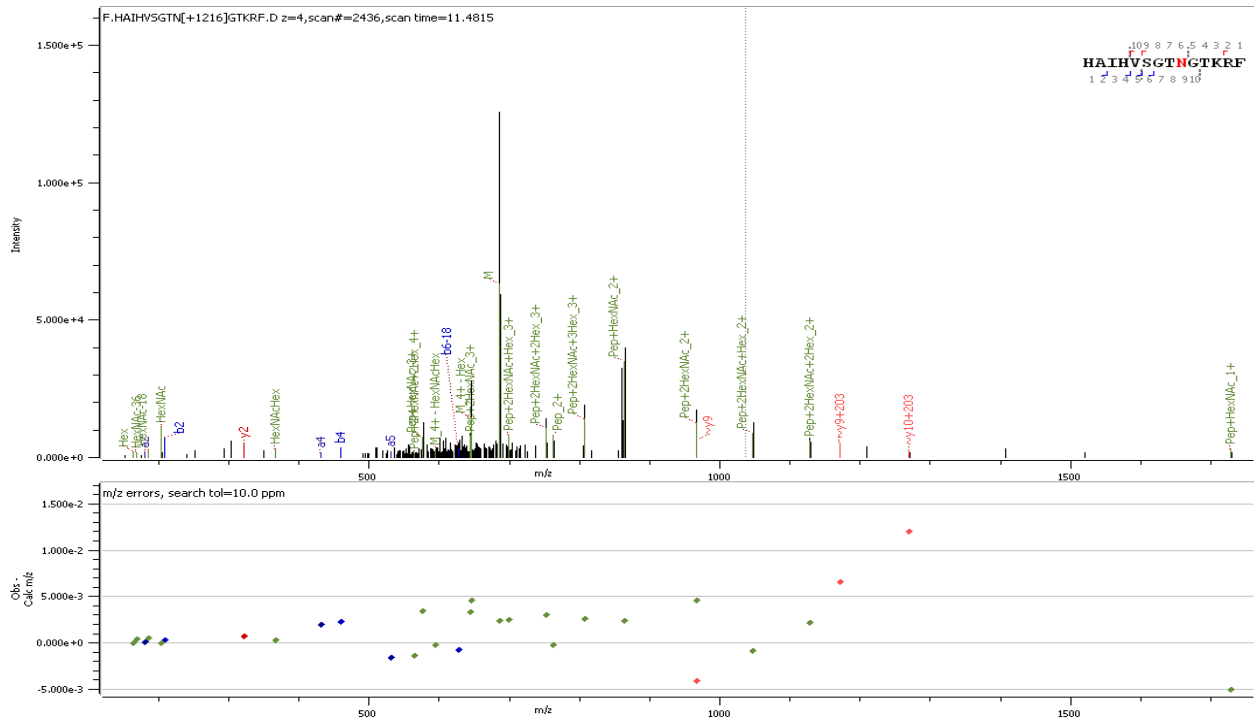

Supp. Figure S7 Spectra of intact N-glycopeptide with assigned N-glycan (GlcNAc<sub>2</sub>Man<sub>5</sub>) at N74

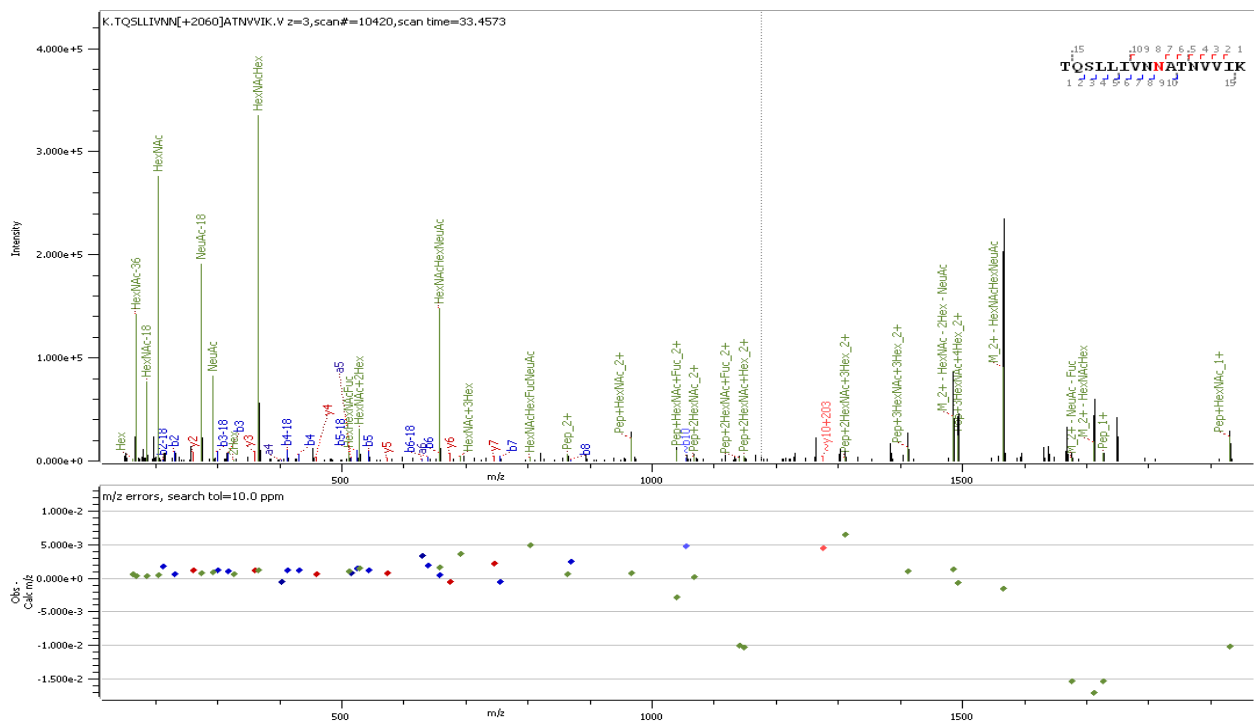

Supp. Figure S8. Spectra of intact N-glycopeptide with assigned N-glycan (GlcNAc<sub>2</sub>Fuc<sub>1</sub>Man<sub>3</sub>GlcNAc<sub>2</sub>Gal<sub>1</sub>NeuAc<sub>1</sub>) at N122

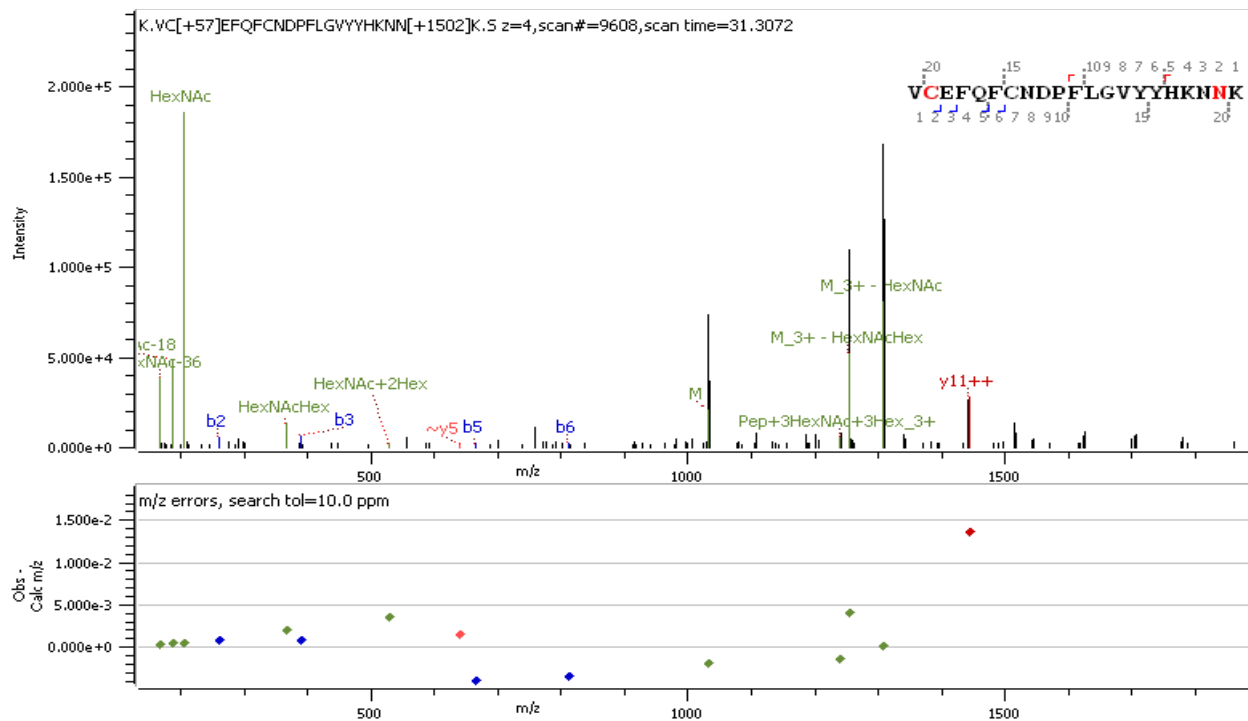

**Supp. Figure S9.** Spectra of intact N-glycopeptide with assigned N-glycan (GlcNAc<sub>2</sub>Man<sub>3</sub>GlcNAc<sub>4</sub>) at N149

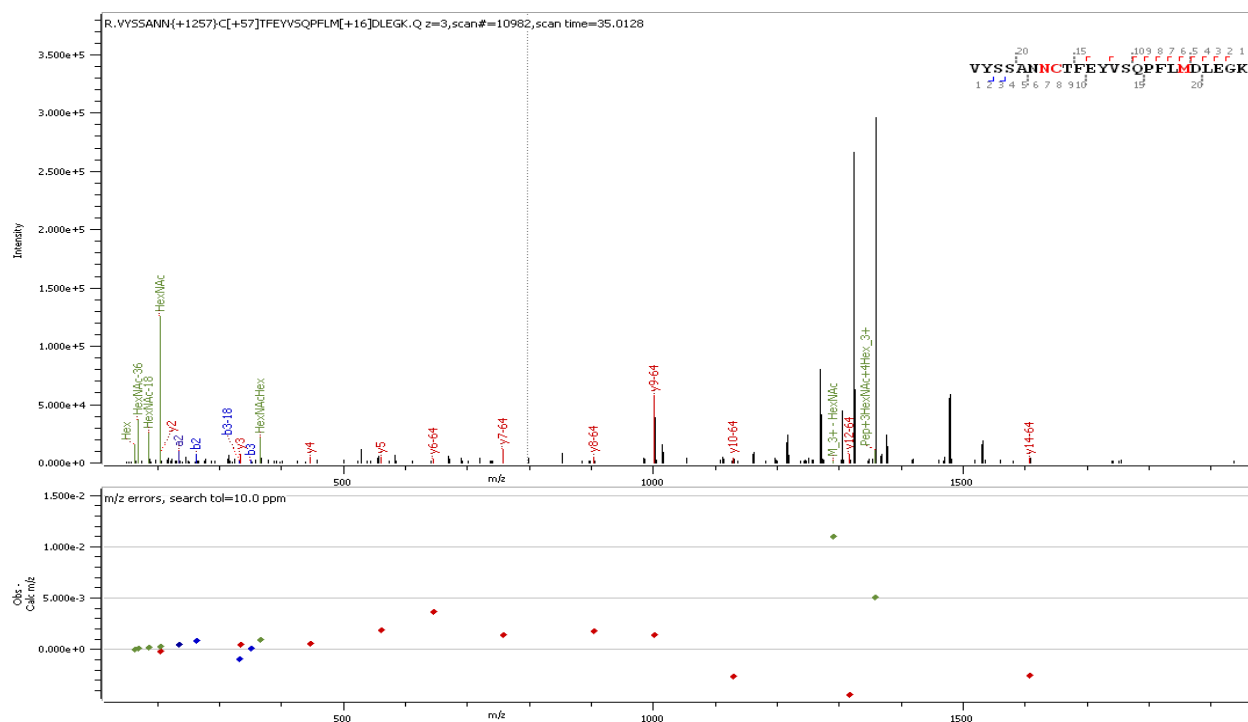

**Supp. Figure S10.** Spectra of intact N-glycopeptide with assigned N-glycan (GlcNAc<sub>2</sub>Man<sub>3</sub>GlcNAc<sub>1</sub>Gal<sub>1</sub>) at N165

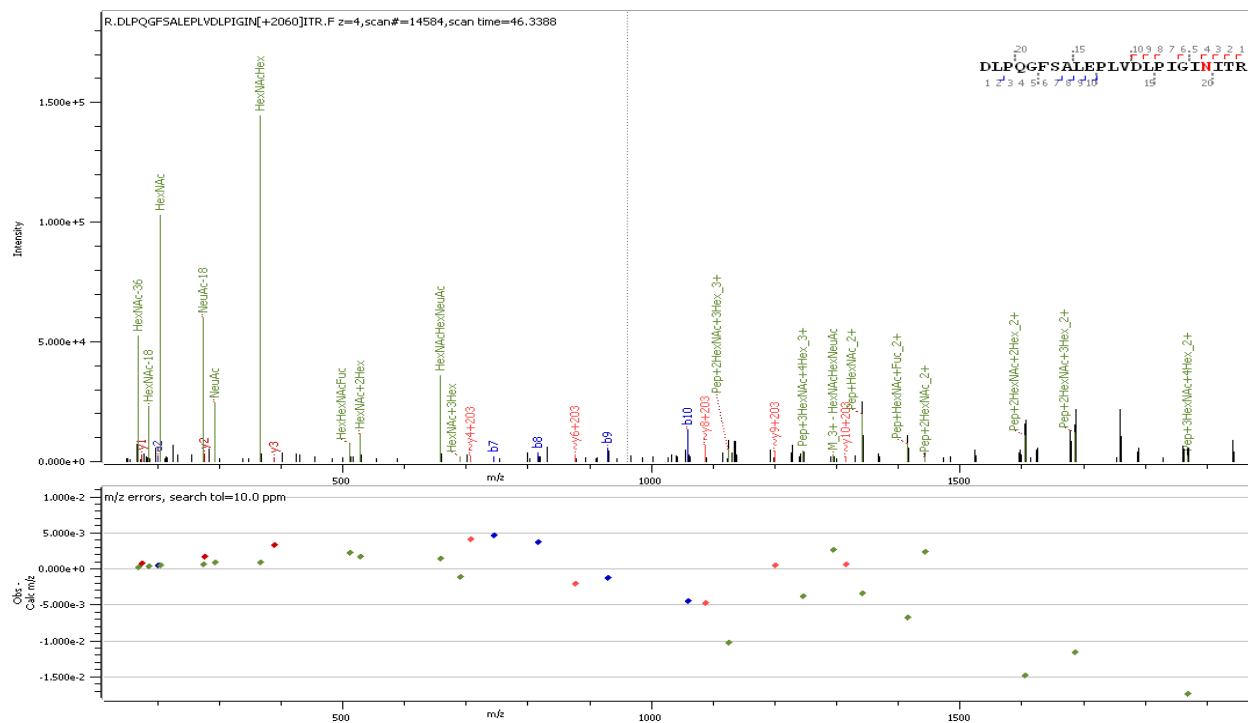

**Supp. Figure S1.** Spectra of intact N-glycopeptide with assigned N-glycan (GlcNAc<sub>2</sub>Fuc<sub>1</sub>Man<sub>3</sub>GlcNAc<sub>2</sub>Gal<sub>2</sub>NeuAc<sub>1</sub>) at N234

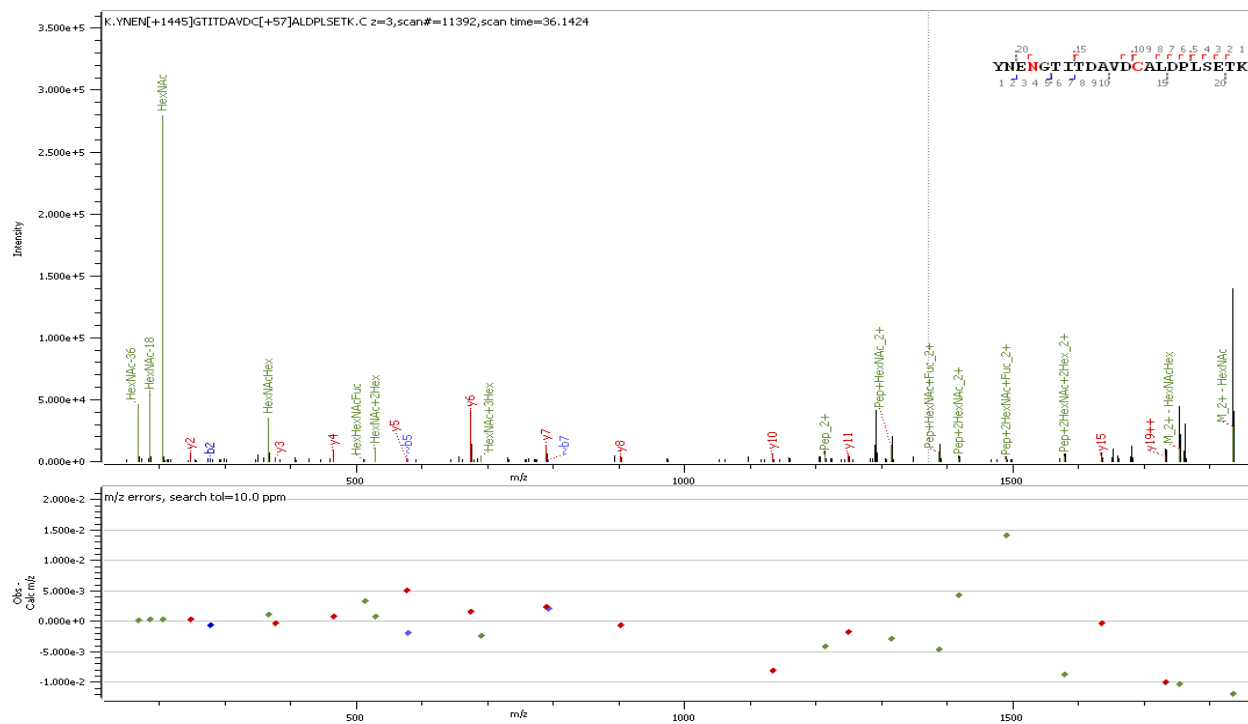

**Supp. Figure S12.** Spectra of intact N-glycopeptide with assigned N-glycan (GlcNAc<sub>2</sub>Fuc<sub>1</sub>Man<sub>3</sub>GlcNAc<sub>2</sub>) at N282

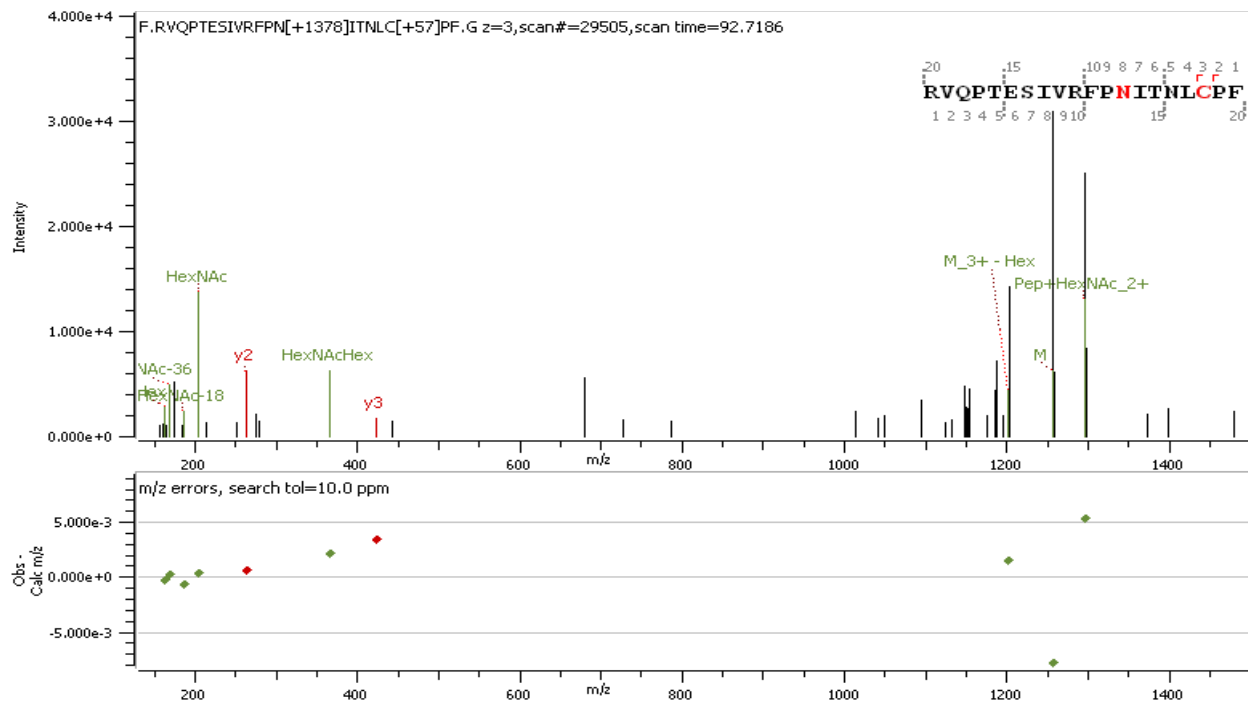

**Supp. Figure S13.** Spectra of intact N-glycopeptide with assigned N-glycan (GlcNAc<sub>2</sub>Man<sub>6</sub>) at N331

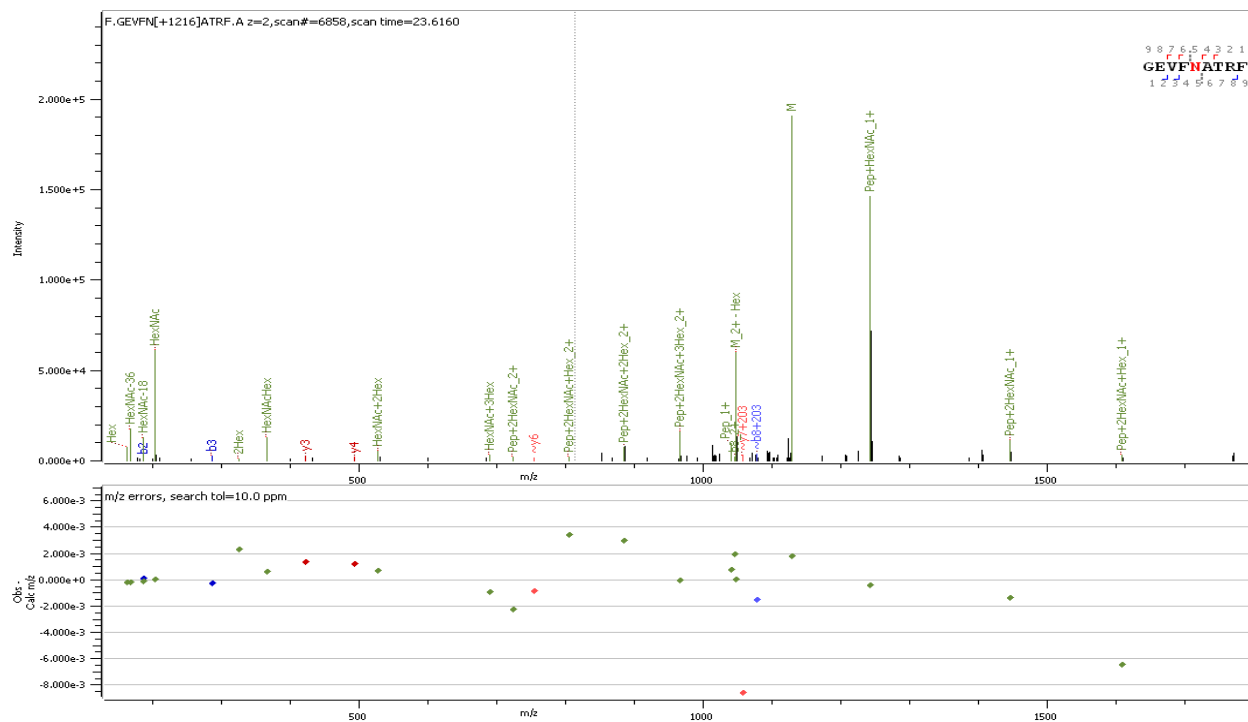

**Supp. Figure S14.** Spectra of intact N-glycopeptide with assigned N-glycan (GlcNAc<sub>2</sub>Man<sub>5</sub>) at N343



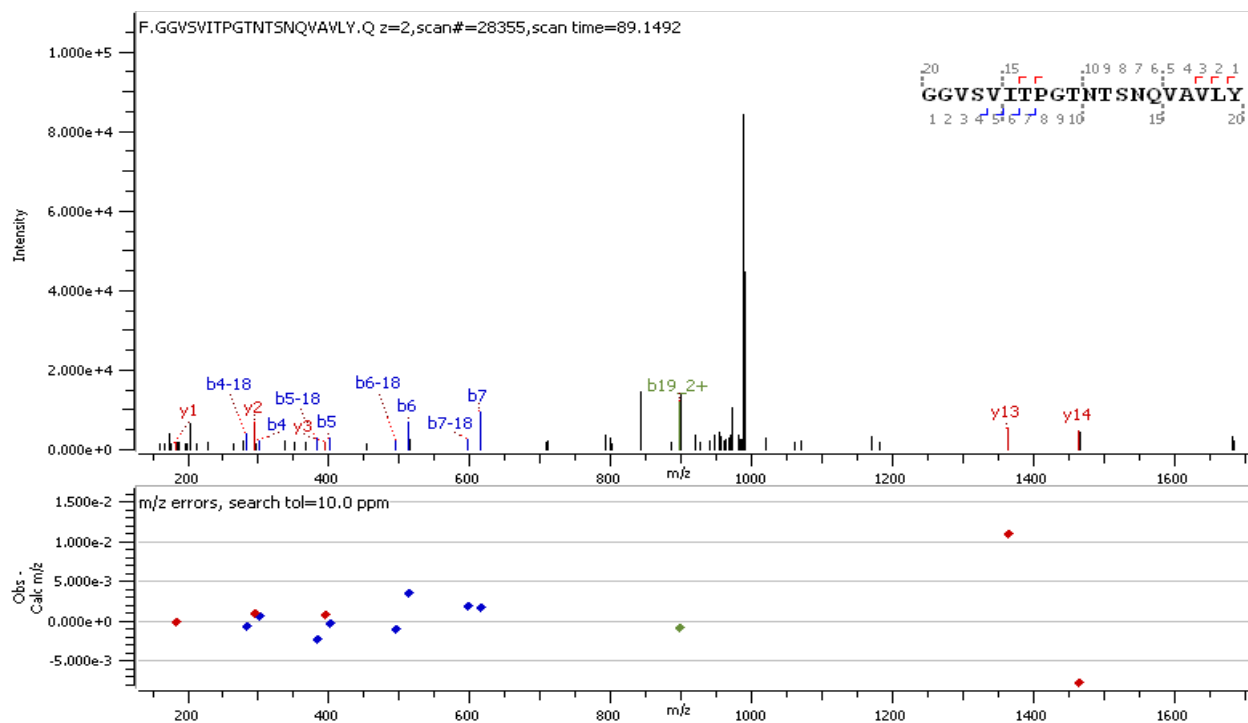

Supp. Figure S15. Spectra of Non-glycosylated peptide at N603

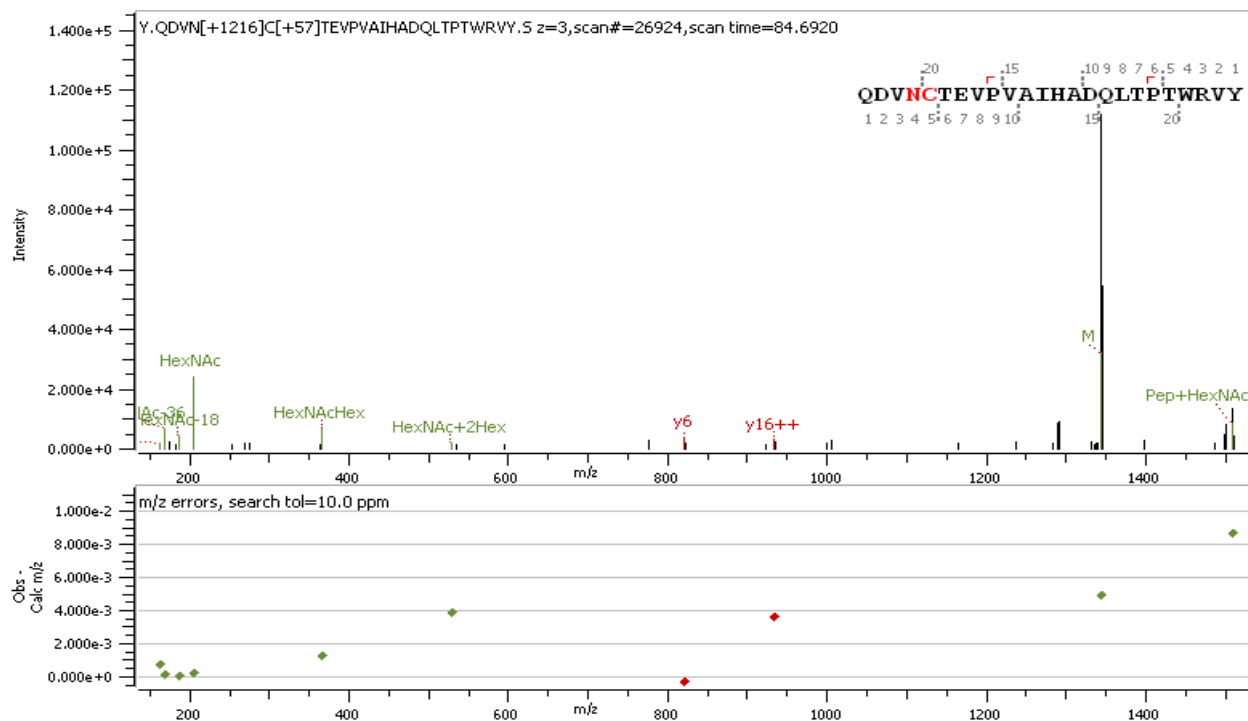

Supp. Figure S16. Spectra of intact N-glycopeptide with assigned N-glycan (GlcNAc<sub>2</sub>Man<sub>5</sub>) at N616

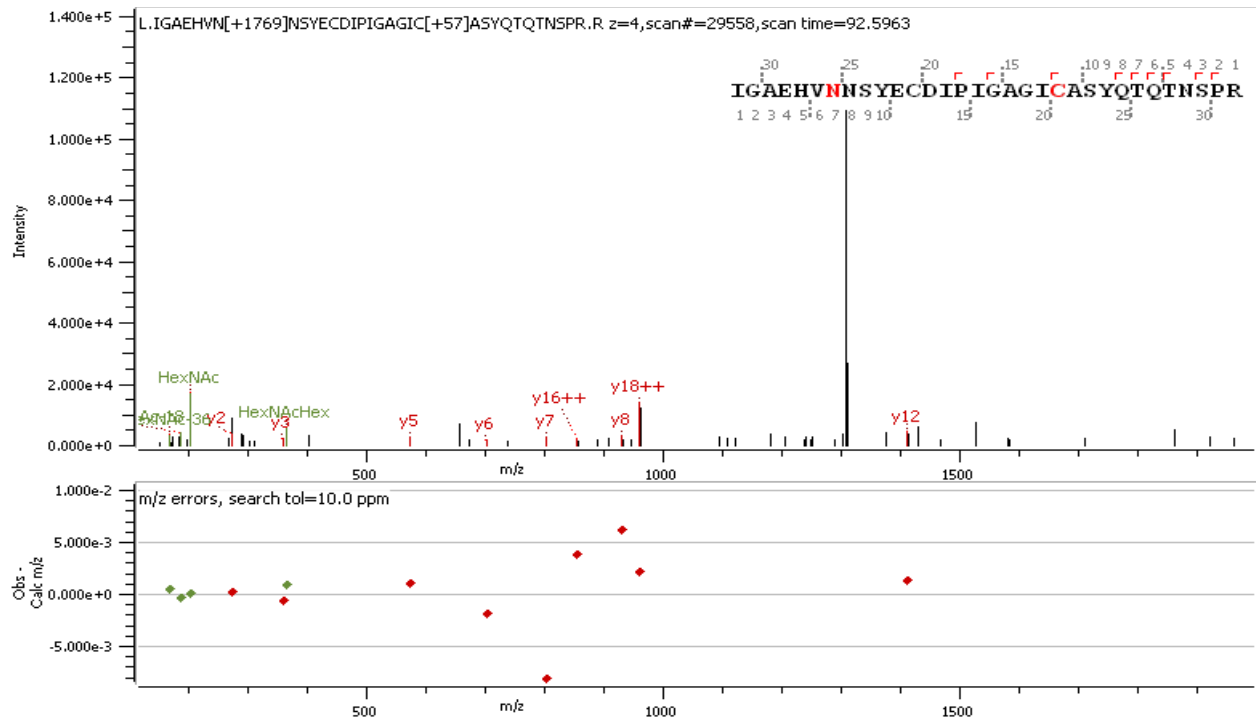

**Supp. Figure S17.** Spectra of intact N-glycopeptide with assigned N-glycan (GlcNAc<sub>2</sub>Fuc<sub>1</sub>Man<sub>3</sub>GlcNAc<sub>2</sub>Gal<sub>2</sub>) at N657.

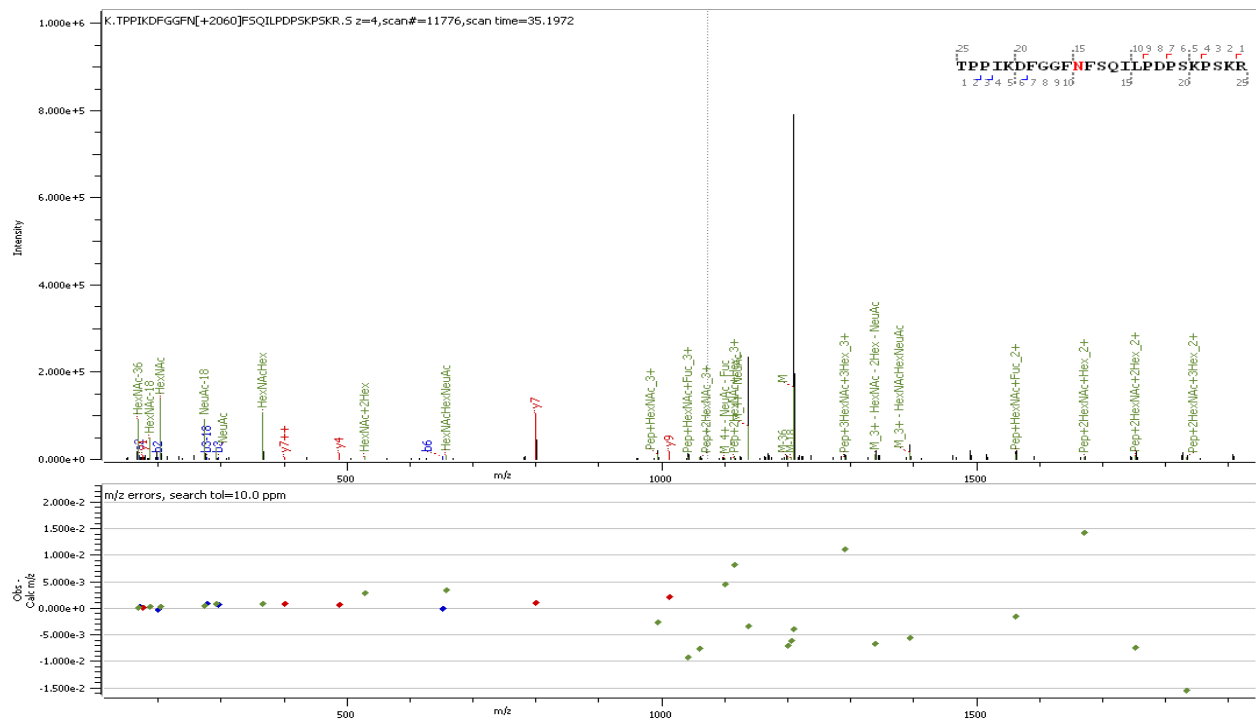

**Supp. Figure S18.** Spectra of intact N-glycopeptide with assigned N-glycan (GlcNAc<sub>2</sub>Fuc<sub>1</sub>Man<sub>3</sub>GlcNAc<sub>2</sub>Gal<sub>2</sub>NeuAc<sub>1</sub>) at N801

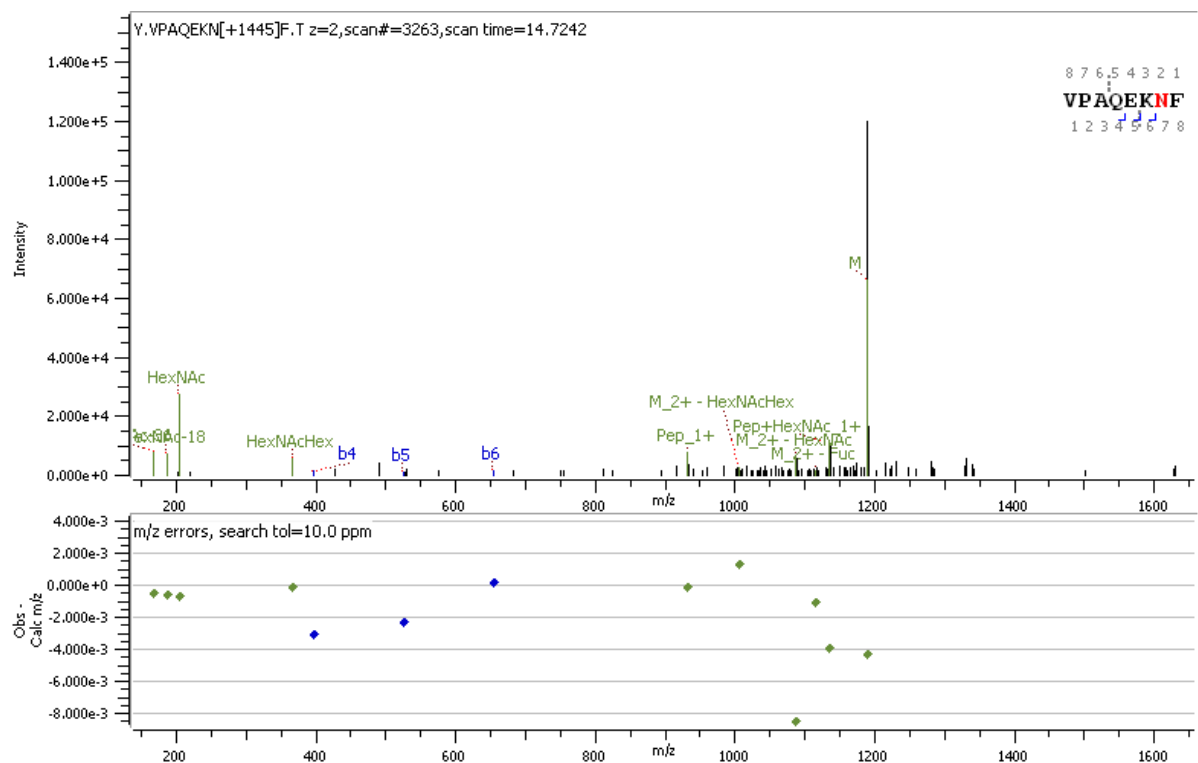

**Supp. Figure S19.** Spectra of intact N-glycopeptide with assigned N-glycan (GlcNAc<sub>2</sub>Fuc<sub>1</sub>Man<sub>3</sub>GlcNAc<sub>2</sub>) at N1074 (peptide found to be 99.3% unglycosylated)

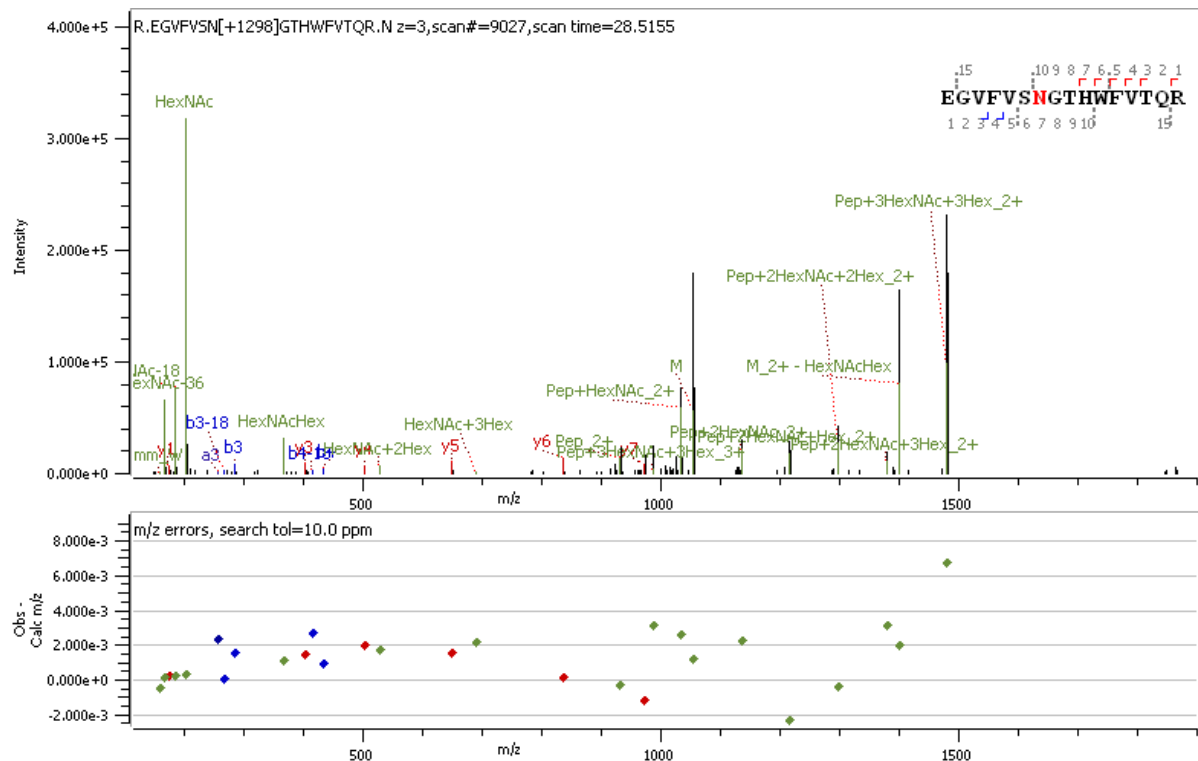

**Supp. Figure S20.** Spectra of intact N-glycopeptide with assigned N-glycan (GlcNAc<sub>2</sub>Fuc<sub>1</sub>Man<sub>3</sub>GlcNAc<sub>2</sub>Gal<sub>2</sub>NeuAc<sub>1</sub>) at N1098

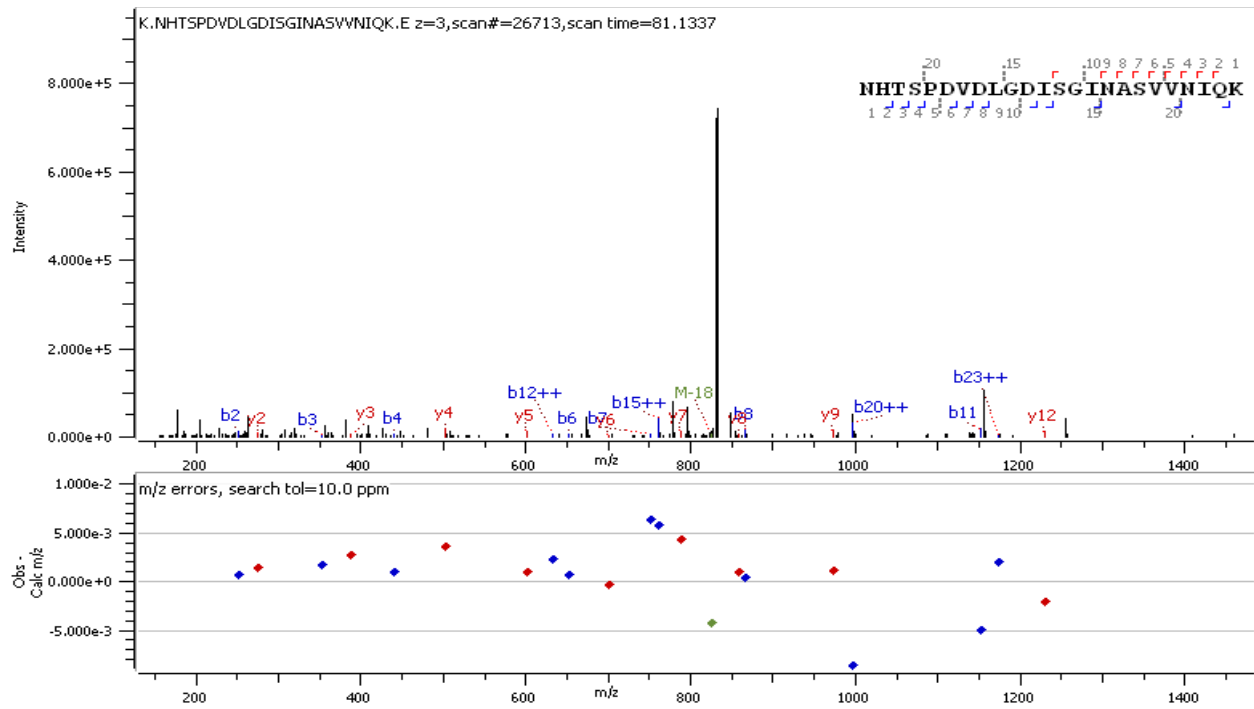

Supp. Figure S21. Spectra of non-glycosylated peptide at N1158

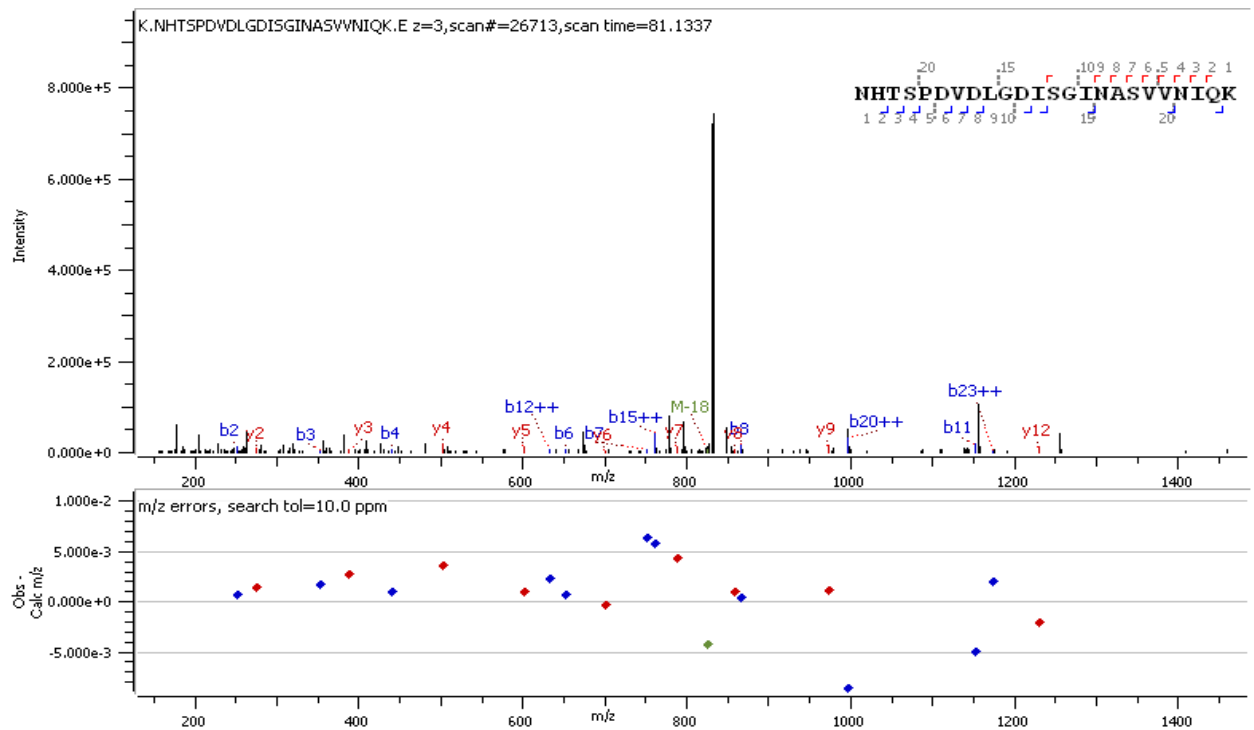

Supp. Figure S22. Spectra of non-glycosylated peptide at N1173

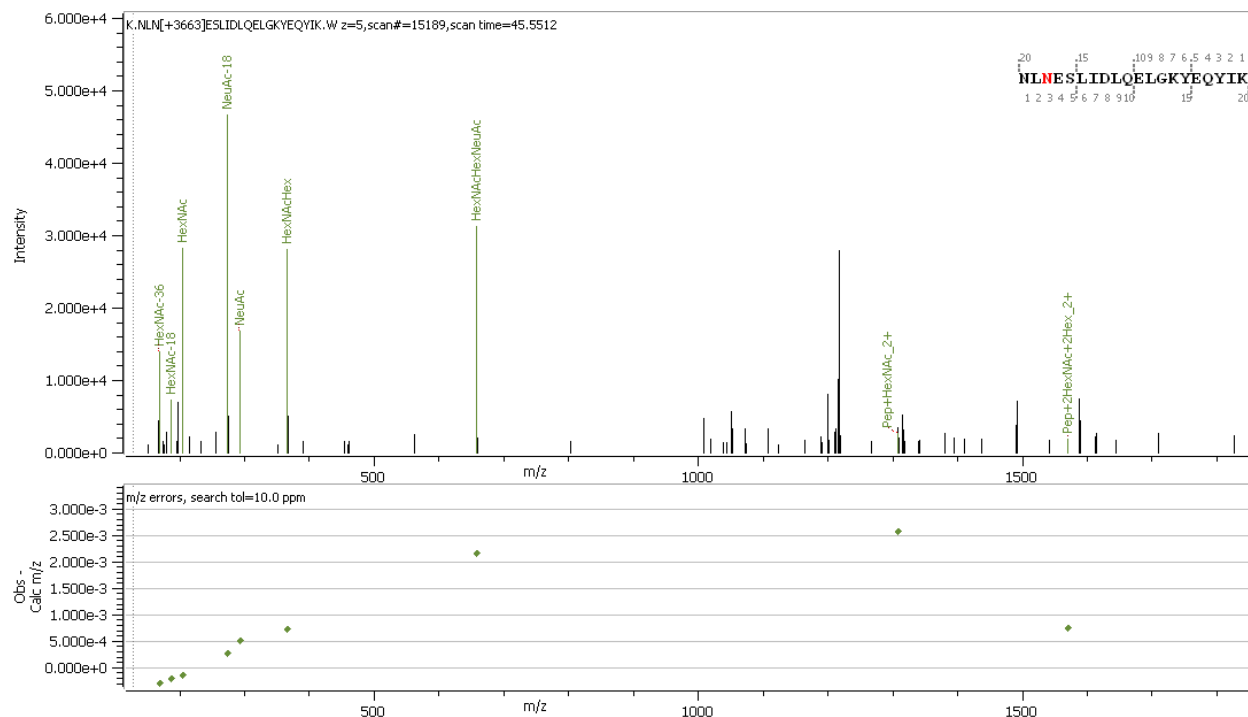

**Supp. Figure S23.** Spectra of intact N-glycopeptide with assigned N-glycan (GlcNAc<sub>2</sub>FucMan<sub>3</sub>GlcNAc<sub>4</sub>Gal<sub>4</sub>NeuAc<sub>4</sub>) at N1194
